# Supplementary material for: Comprehensive analysis of normal adjacent to tumor transcriptomes
Source: PubMed Central journal article supplement (PMC5651823; doi:10.1038/s41467-017-01027-z), 2017-10-20
Supplement: 41467_2017_1027_MOESM2_ESM.pdf [file 41467_2017_1027_MOESM2_ESM.pdf]

## **Description of Additional Supplementary Files**

File Name: Supplementary Data 1

Description: Differential expression analysis between healthy tissues and NAT in each of the eight tissue types.

File Name: Supplementary Data 2

Description: Genes upregulated/downregulated in comparison of NAT and healthy, and the number of tissue types they were perturbed in.

File Name: Supplementary Data 3

Description: GSEA hallmark gene sets analysis of NAT vs. healthy tissues and NAT vs. tumor.

File Name: Supplementary Data 4

Description: Differential expression analysis between tumors and NAT in each of the eight tissue types.

File Name: Supplementary Data 5

Description: Top 100 upstream regulators of the 18-shared TASA genes as found by Ingenuity Pathway Analysis.

File Name: Supplementary Data 6

Description: Spearman coefficients of the correlations between TASA in the NAT tissue with the expression of genes in the paired tumor samples in each tumor type.

File Name: Supplementary Data 7

Description: Enrichment scores of 30 cell types generated by xCell.
